# Supplementary material for: In situ encapsulating silver nanocrystals into hydrogels. A “green” signaling platform for thiol-containing amino acids or small peptides
Source: Royal Society of Chemistry journal article supplement (doi:10.1039/c0cc04208k), 2010-12-21
Supplement: c0cc04208k.pdf [file c0cc04208k.pdf]

***In situ* encapsulating silver nanocrystals into hydrogels. A “green”  
signaling platform for thiol-containing amino acids or small peptides**

Jiang-Shan Shen\* and Bin Xu

*Institute of Urban Environment, Chinese Academy of Sciences, Xiamen, 361021,  
China. Fax: (+86)592-619-0577; Tel: (+86)592-619-0577; E-mail: jssh@iue.ac.cn*

**Supporting Information**

## Chemicals and characterizations

All chemicals commercially available at AR grade were used as received.

Field emission scanning electron microscopy (FESEM) experiments were carried out on HITACHI S-4800 working at an accelerating voltage of 20 kV. Transmission electron microscopy (TEM) experiments were performed on HITACHI H-7650 system. X-Ray powder diffractions (XRD) were performed on Panalytical X'pert PRO diffractometer equipped with Cu  $K\alpha$  radiation ( $\lambda = 1.5418 \text{ \AA}$ ) at room temperature.

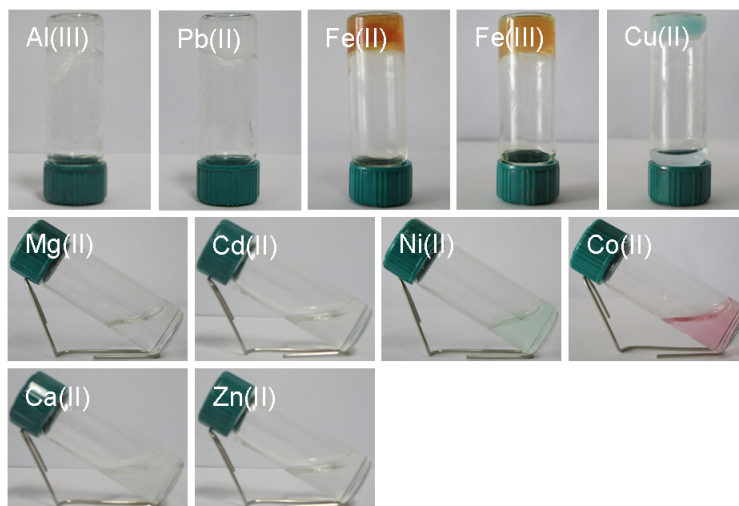

**Fig. S1.** The photos of NaCMC (0.8 %, wt) in the presence of Al(III), Pb(II), Fe(II), Fe(III), Cu(II), Mg(II), Cd(II), Ni(II), Co(II), Ca(II), and Zn(II), respectively. All metal ions concentrations are 0.045 M.

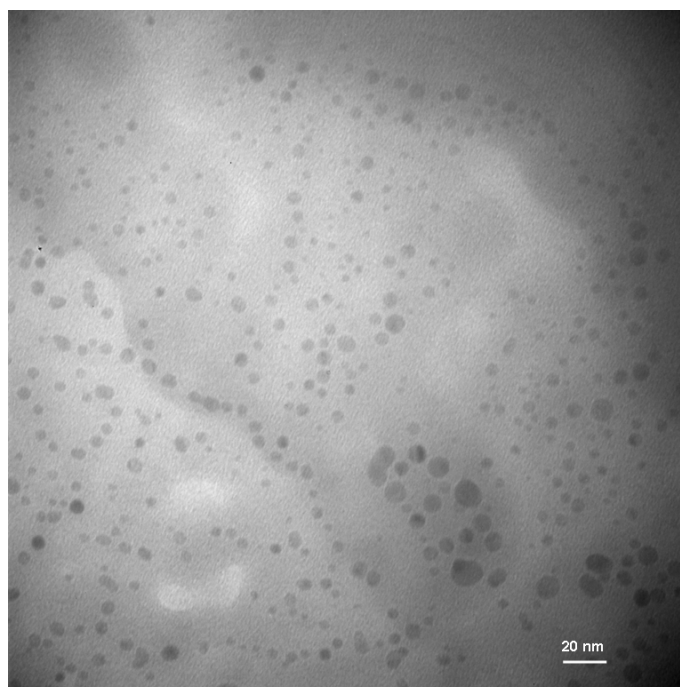

**Fig. S2** TEM image of xerogel from the corresponding original irradiated hydrogel of NaCMC-Ag(I). The scale bar is 20 nm.

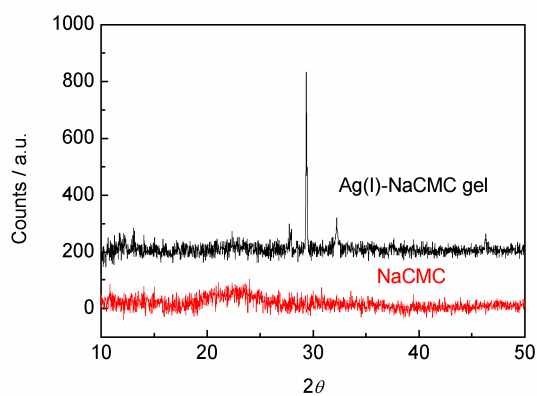

**Fig. S3** Powder X-ray diffraction patterns of the xerogel from the corresponding original irradiated hydrogel of NaCMC-Ag(I) and of NaCMC.
